# Supplementary material
Source: Springer Nature journal article supplement (https://www.springermedizin.de/resource/supplementary/12936_2009_1089_MOESM5_ESM.pdf/9550014)
Supplement: MOESM5 [file 9550014]

Haplotype frequency

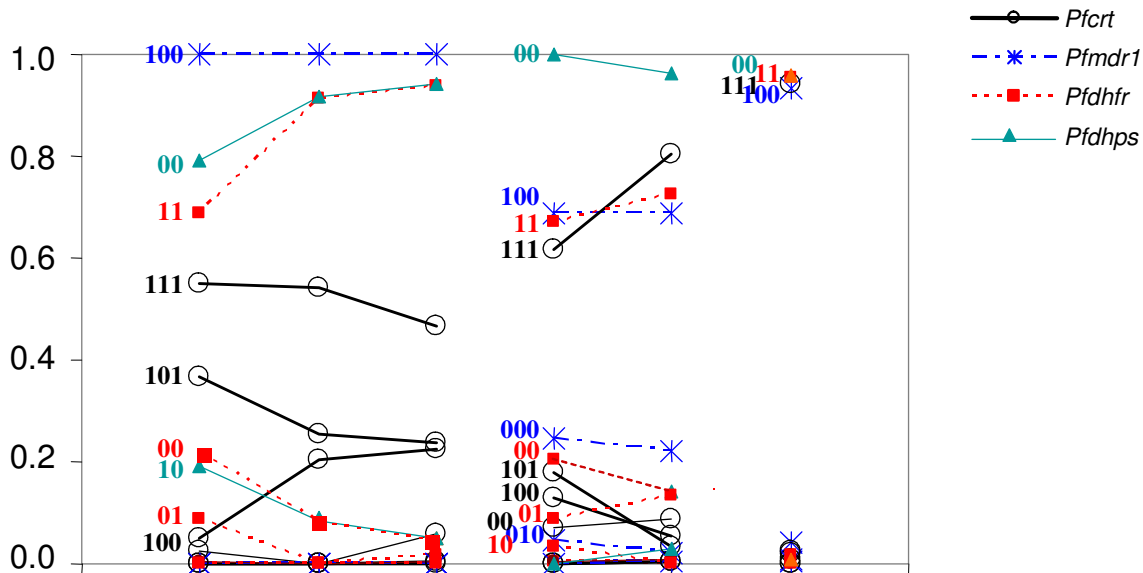

Site

Karimui

Karimui

Karimui

South  
Wosera

South  
Wosera

North  
Coast

Year

2003

2004

2005

2003

2004

2004

TFR

27.8

18.3

16.4

16.1

21.7

11.5
